# Supplementary material for: More stable structures lead to improved cycle stability in photocatalysis and Li-ion batteries
Source: Royal Society of Chemistry journal article supplement (doi:10.1039/c3ra23233f), 2013-01-01
Supplement: c3ra23233f.pdf [file c3ra23233f.pdf]

# Electronic Supplementary Information

## More Stable Structures Lead to Improved Cycle Stability in Photocatalysis and Li-ion Batteries

Wei Zhou,<sup>a</sup> Lijuan Lin,<sup>a</sup> Wei Wei,<sup>a</sup> Hong Jin,<sup>a</sup> Jinghong Li,<sup>\*b</sup> and Lin Guo<sup>\*a</sup>

<sup>a</sup>School of Chemistry and Environment, Beihang University, Beijing 100191, China;

<sup>b</sup>Department of Chemistry, Beijing Key Laboratory for Microanalytical Methods and Instrumentation,  
Tsinghua University, Beijing 100084, China

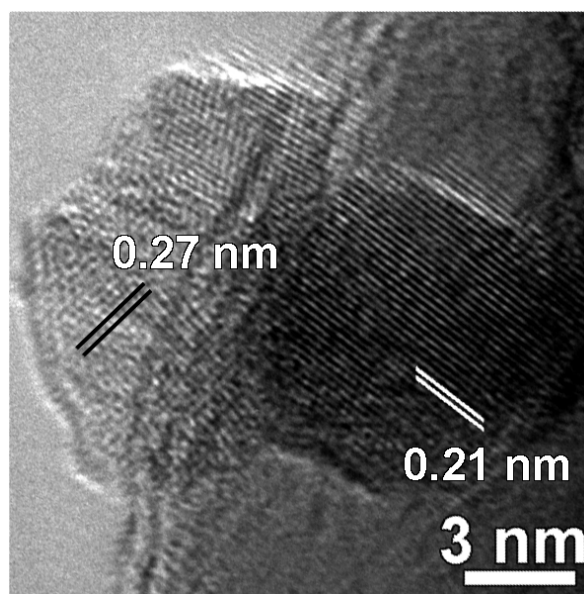

**Fig. S1** HRTEM image of NPs ~5-10 nm in diameter. The spacing of 0.21 and 0.27 nm can be indexed to the planes of (110)<sub>Fe</sub> and (104)<sub>Fe<sub>2</sub>O<sub>3</sub></sub>, respectively. Obviously, the NP with spacing of 0.21 nm was pure iron while the surface NP was oxidized to Fe<sub>2</sub>O<sub>3</sub>.

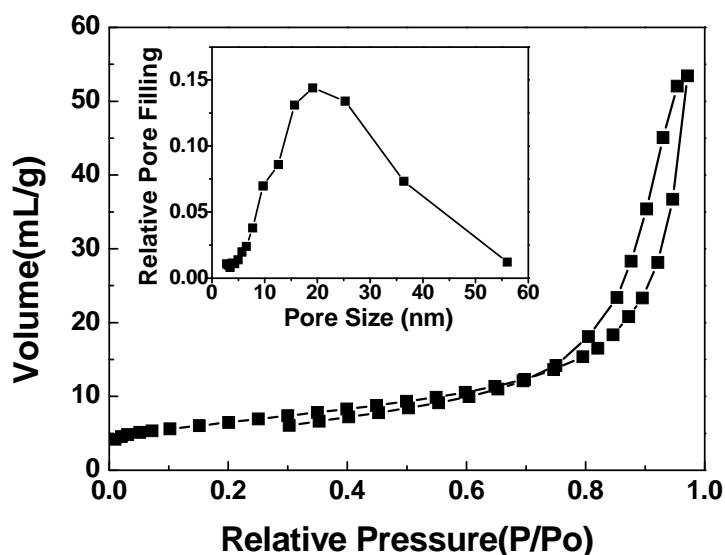

**Fig. S2** Nitrogen adsorption-desorption isotherms and pore size distributions (the inset) of the Fe<sub>2</sub>O<sub>3</sub> networks, showing the specific surface area of 23 m<sup>2</sup>/g with an average pore size of 15.65 nm.

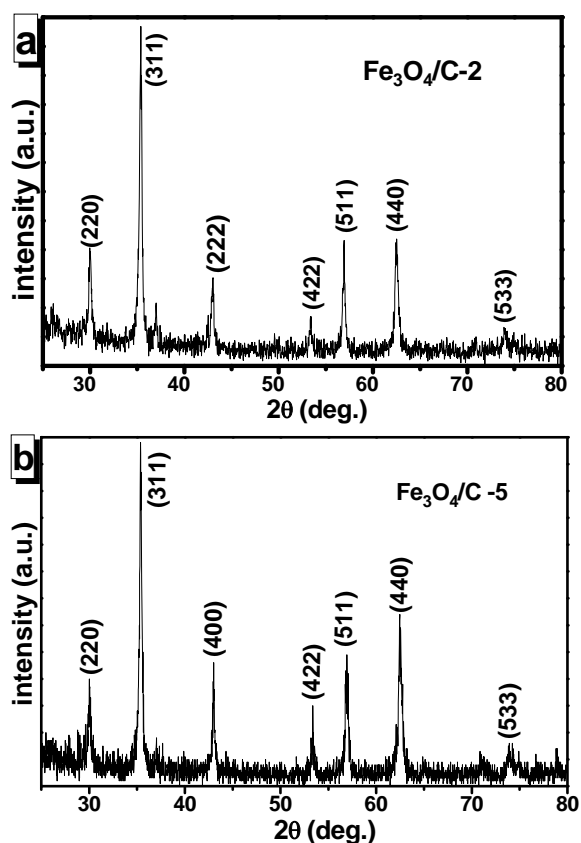

**Fig. S3** XRD patterns for (a) the Fe<sub>3</sub>O<sub>4</sub>/C-2 sample and (b) the Fe<sub>3</sub>O<sub>4</sub>/C-5 sample. The samples were pure Fe<sub>3</sub>O<sub>4</sub> with amorphous carbon layers.

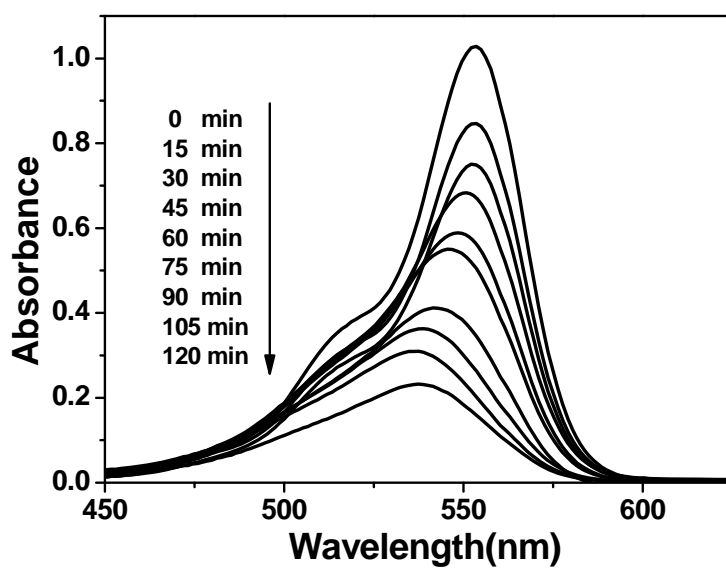

**Fig. S4** Absorption spectrum of a RB solution ( $1.0 \times 10^{-5}$  M, 60 mL) adding 30 mg network sample as catalyst at the first cycle.

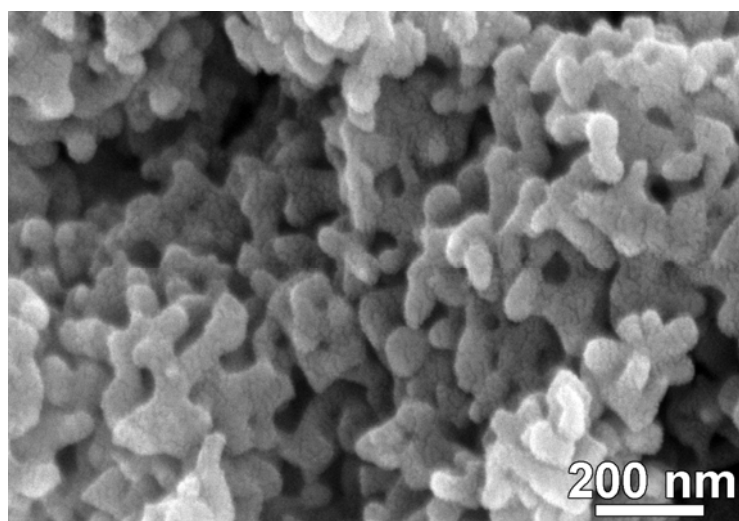

**Fig. S5** SEM image for the sample after photocatalytic experiments with 4 cycles, showing its structure stability with unchangeable networks.

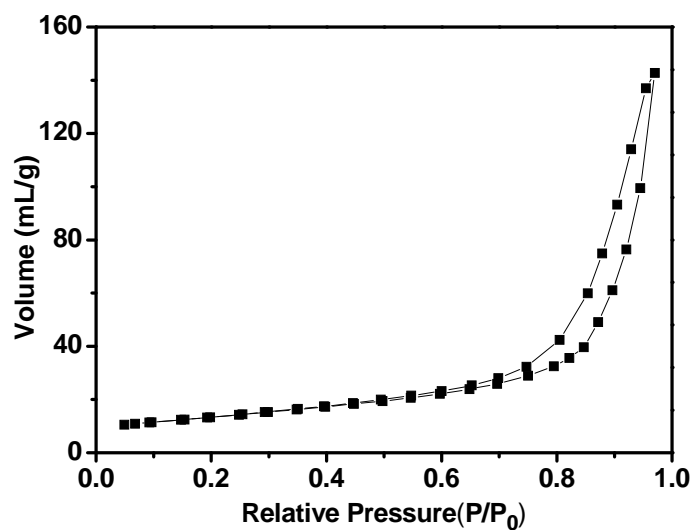

**Fig. S6** Nitrogen adsorption-desorption isotherms of the commercial Fe<sub>2</sub>O<sub>3</sub> particles, showing the specific surface area of 47 m<sup>2</sup>/g.

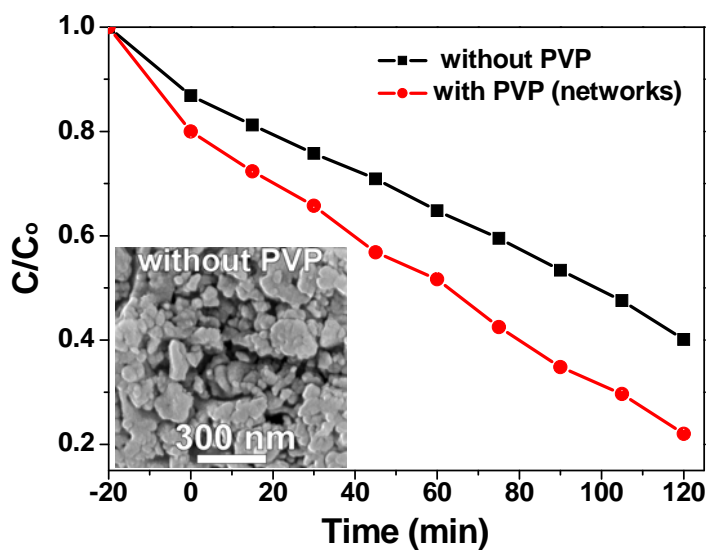

**Fig. S7** Photocatalytic performance using the as-obtained hematite network (with PVP) and other hematite sample (without PVP, the inset shows its SEM image with aggregated structures) as catalysts.

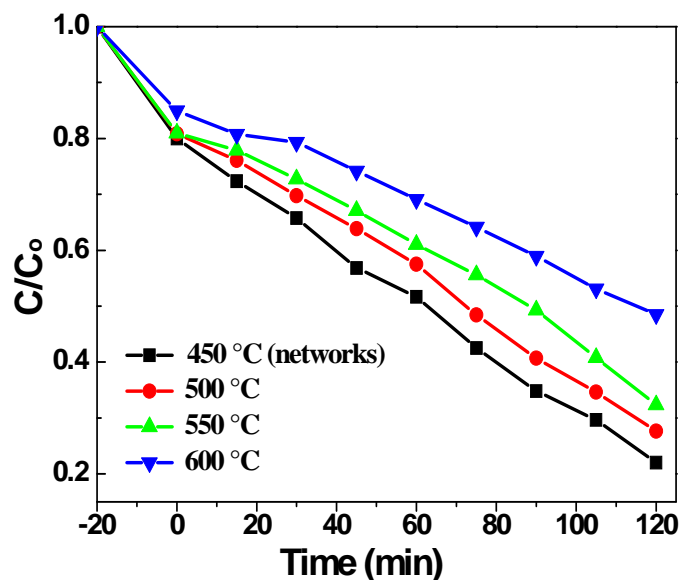

**Fig. S8** Photocatalytic results with four different catalysts. The four catalysts were burned at the temperatures of 450 °C, 500 °C, 550 °C, and 600 °C, showing degradation rates of 78 %, 72 %, 67 %, and 51 %, respectively.

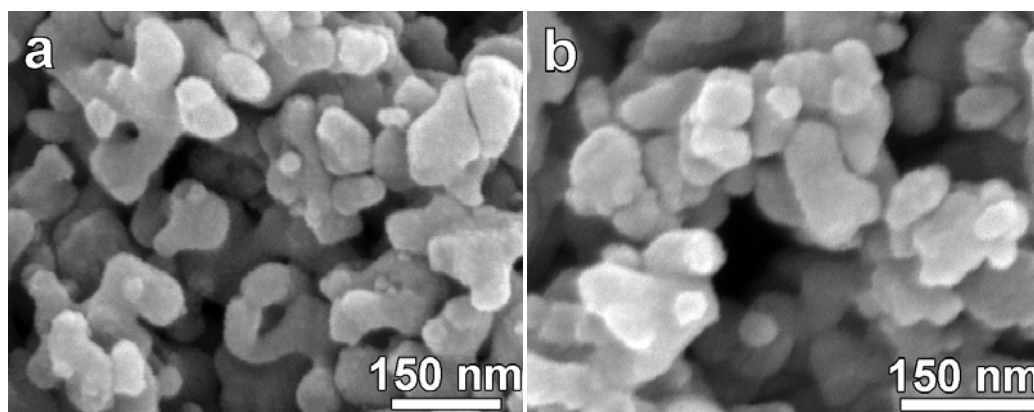

**Fig. S9** SEM images of the hematite samples at burning temperature of 550 °C (a) and 600 °C (b). The hematite networks were obtained at 450 °C. Obviously, the aggregated particles were obtained instead of networks with increased temperature.

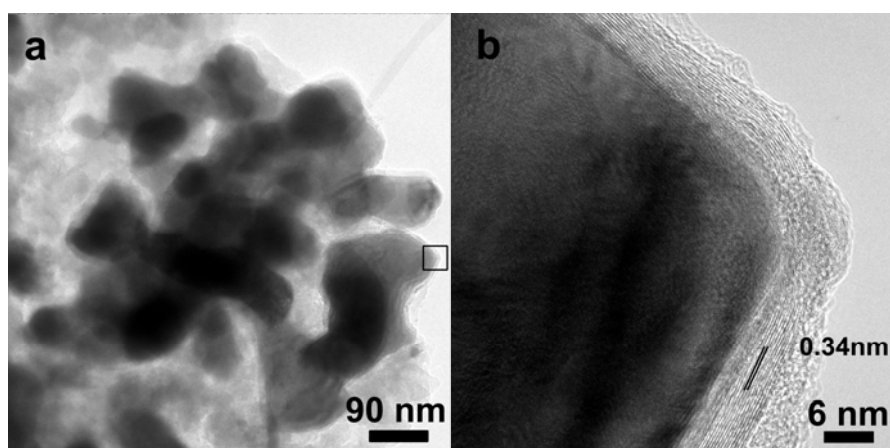

**Fig. S10** (a) TEM image of the  $\text{Fe}_3\text{O}_4/\text{C}$ -8 sample as Li-ion battery electrode materials after 90 cycles. (b) HRTEM image corresponding to the marked frame in Fig. S10a, showing onion-like carbon layers capped the  $\text{Fe}_3\text{O}_4$  particle. The spacing of 0.34 nm could be ascribed to the graphite's layering of (002).
